# Supplementary material
Source: Springer Nature journal article supplement (https://www.springermedizin.de/resource/supplementary/12960_2009_230_MOESM2_ESM.pdf/9570692)
Supplement: MOESM2 [file 9570692]

### Malawi (2006 - 2008)

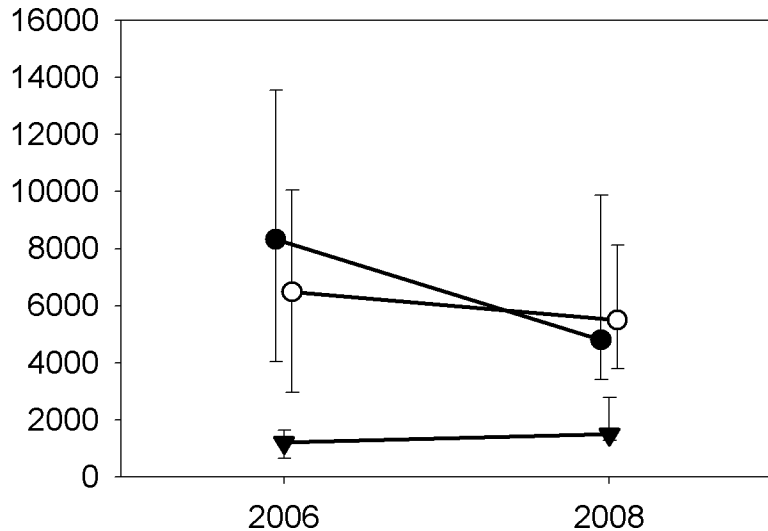

### Zambia (2004 - 2007)

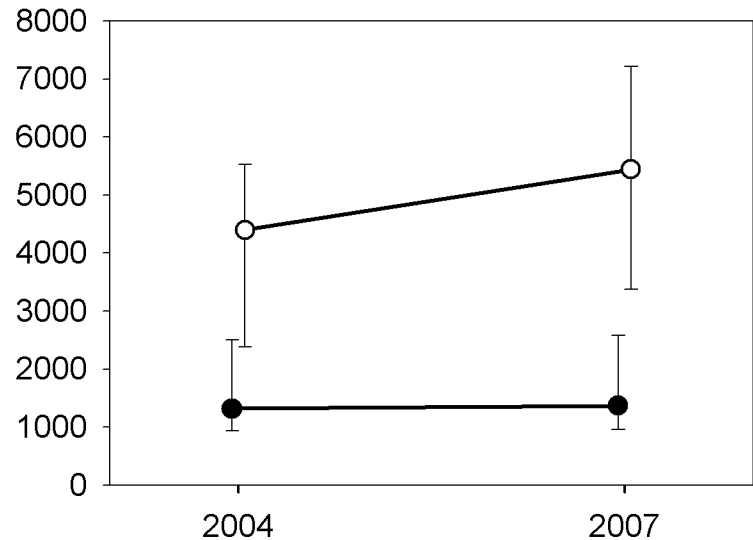

Year

- Urban (Facilities: Malawi 6, Zambia 12)
- Rural (Facilities: Malawi 34, Zambia 9)
- ▼ Semi-Urban (Facilities: Malawi 7)
